# Supplementary material
Source: publisher site journal article supplement (https://www.dovepress.com/get_supplementary_file.php?f=390473.docx)
Supplement: Supplementary file 1 [file get_supplementary_file.php]

**Supplementary materials**

**Table S1** Spearman's rank correlation analysis of IgE levels of the animal allergens

| **Allergen** | **Cat dander** | **Dog dander** | **Horse dander** |
| --- | --- | --- | --- |
| Cat dander | 1 |  |  |
| Dog dander | 0.834* | 1 |  |
| Horse dander | 0.755* | 0.761* | 1 |

**Notes:** *p<0.05. Spearman's rank correlation analysis showed that there was a significant correlation between cat, dog and horse dander. The depth of color between the two allergens represented the degree of relationship between them.

**Table S2** Sensitization prevalence and total number of animal allergens by city

| **Region** | **City** | **N** | **Cat sensitized** | | **Dog sensitized** | | **Horse sensitized** | | ***P* value*** |
| --- | --- | --- | --- | --- | --- | --- | --- | --- | --- |
| n | Po% | n | Po% | n | Po% |
| **Eastern** | Beijing | 119 | 13 | 10.9% | 7 | 5.9% | 5 | 4.2% | 0.107 |
| Guangdong | 238 | 24 | 10.1% | 14 | 5.9% | 16 | 6.7% | 0.186 |
| Hebei | 58 | 9 | 15.5% | 5 | 8.6% | 6 | 10.3% | 0.480 |
| Jiangsu | 204 | 23 | 11.3% | 14 | 6.9% | 21 | 10.3% | 0.279 |
| Shandong | 272 | 13 | 4.8% | 9 | 3.3% | 2 | 0.7% | **0.018** |
| **Western** | Gansu | 582 | 134 | 23.0% | 85 | 14.6% | 25 | 4.3% | **<0.001** |
| Inner Mongolia Autonomous Region | 185 | 29 | 15.7% | 22 | 11.9% | 5 | 2.7% | **<0.001** |
| Ningxia Hui Autonomous Region | 196 | 43 | 21.9% | 25 | 12.8% | 14 | 7.1% | **<0.001** |
| Shaanxi | 127 | 10 | 7.9% | 5 | 3.9% | 3 | 2.4% | 0.103 |
| Sichuan | 219 | 16 | 7.3% | 12 | 5.5% | 4 | 1.8% | 0.205 |
| Yunnan | 177 | 41 | 23.2% | 24 | 13.6% | 30 | 16.9% | 0.057 |

**Notes:** The Eastern and Western regions are divided according to the geographical location and the level of economic development of the city. n - Number of patients with positive results; Po% refers to the prevalence of animal sensitization in the study population in the region. *P value refers to the comparison among the three groups of cat sensitized, dog sensitized, horse sensitized. If the difference between groups is statistically significant, use bold fonts.

**Figure S1: Questionnaire on the epidemiology of allergens in allergic diseases in China**

Investigation unit: Patient's clinical diagnosis (tick): ○ Asthma, ○ Allergic rhinitis, ○ Asthma combined with allergic rhinitis

No. _______________

1. Name of patient: *

_________________________________

Clinic number:

_________________________________

Contact number:

_________________________________

1. Age: years old

3. Your gender: [Single-choice]*

○Male ○Female

4. Ethnicity [Single-choice]*

○Han ○Uyghur ○Tibetan ○Hui ○Other _________________

5. Place of residence [Single-choice]*

○Native ○Immigrant, years of residence

Address: ____________ Province _________________ City _________________ County/District

1. Mode of birth:

○Vaginal delivery ○Cesarean delivery

1. Do you suffer from any of the following diseases?

□ Allergic rhinitis □ Bronchial asthma □ Eye allergy □ Food allergy

□ Atopic dermatitis □ No □ Other, please specify _________________

1. Does anyone in your household smoke? (If not, please skip to question 11)

○Yes ○No

1. How many people smoke [fill in the blanks]: people

10 How many cigarettes do all smokers smoke in total per day?

○1-10 units ○10-20 units ○20-60 units ○60 units or more

11. Do any members of your family suffer from allergic diseases? (allergic rhinitis, bronchial asthma, atopic dermatitis, eye allergies, food allergies or other) (If no, skip to question 16)*

○Yes ○No

12. Has your father ever suffered from any of the following diseases? [Multiple choice]*

□ Allergic rhinitis □ Bronchial asthma □ Eye allergy □ Food allergy

□ Atopic dermatitis □ No □ Other, please specify _________________

13 Has your mother ever suffered from any of the following diseases? [Multiple choice]*

□ Allergic rhinitis □ Bronchial asthma □ Eye allergy □ Food allergy

□ Atopic dermatitis □ No □ Other, please specify _________________

14. Do you have any siblings? (If no, please skip to question 16)*

○Yes ○No

15. If yes, have the siblings ever suffered from any of the following diseases? [Multiple choice]*

□ Allergic rhinitis □ Bronchial asthma □ Eye allergy □ Food allergy

□ Atopic dermatitis □ No □ Other, please specify _________________

1. During the past 12 months, have you had symptoms of an itchy nose, nasal congestion, or sneezing occur? [Single choice]*

○Yes ○No

If so, please answer the following questions.

16-1. In the past 12 months, have you had contact with grass, trees, or flowers? [Single choice] *

○Yes ○No

16-2. If yes, did the above symptoms occur after exposure?

○Yes ○No

16-3. In which months do you have the above nasal symptoms (sneezing, runny nose, itchy nose, stuffy nose)? [Multiple choice]*

□ January □ February □ March □ April □ May □ June □ July

□ August □ September □ October □ November □ December □ Irregular

16-4. In the past 12 months, have you had contact with animals, such as horses, dogs, cats, or furred animals such as voles? [Single choice] *

○Yes ○No

16-5. If yes, did the above symptoms occur after exposure?

○Yes ○No

17 During the past 12 months, have you had a gritty feeling, redness, tearing, or itching in your eyes? [Single choice]

○Yes ○No

If so, please answer the following questions.

17-1. In the past 12 months, have you had contact with grass, trees, or flowers? [Single choice] *

○Yes ○No

17-2. If yes, did the above symptoms occur after exposure?

○Yes ○No

17-3. In which month would the above symptoms in your eyes appear? [Multiple choice]*

□ January □ February □ March □ April □ May □ June □ July

□ August □ September □ October □ November □ December □ Irregular

17-4. In the past 12 months, have you had contact with animals, such as horses, dogs, cats, or furred animals such as voles? [Single choice] *

○Yes ○No

17-5. If yes, did the above symptoms occur after exposure?

○Yes ○No

18. Do your eye symptoms coincide with symptoms of nasal discomfort? [Single choice]*

○Yes ○No

19. **Visual Analogue Scale (VAS).**

☺ no signs ☹ severe

Please identify the location on the visual analogue rating scale that best reflects the severity of each of your rhinitis symptoms and mark the scores in the following table.

1. Sneezing └──┴──┘

2. Runny nose └──┴──┘

3. Nasal congestion └──┴──┘

4. Itchy nose └──┴──┘

5. Itchy eyes └──┴──┘

6. Conjunctival congestion └──┴──┘

7. Shed a tear └──┴──┘

8. Loss of sense of smell └──┴──┘

9. Eyelid edema └──┴──┘

Please identify the location on the visual analogue rating scale that best reflects the severity of rhinitis symptoms affecting quality of life and mark the score in the following table.

1. Effects on sleep └──┴──┘

2. Impact on work or study └──┴──┘

3. Impact on social activities └──┴──┘

4. Effects on physical activity └──┴──┘

20 In the past 12 months, have you had symptoms of shortness of breath, wheezing, chest tightness and shortness of breath at night, or coughing?

○Yes ○No

If so, please answer the following questions.

20-1. In the past 12 months, have you had contact with grass, trees, or flowers? [Single choice] *

○Yes ○No

20-2. If yes, did the above symptoms occur after exposure?

○Yes ○No

20-3. In which month would the above symptoms appear? [Multiple choice]*

□ January □ February □ March □ April □ May □ June □ July

□ August □ September □ October □ November □ December □ Irregular

20-4. In the past 12 months, have you had contact with animals, such as horses, dogs, cats, or furred animals such as voles? [Single choice] *

○Yes ○No

20-5. If yes, did the above symptoms occur after exposure?

○Yes ○No

20-6 In the past 12 months, have you used nebulized inhalation medications to help with breathing? [Single choice] *

○Yes ○No

20-7. are you currently using any medications (including inhaled or oral medications) to treat your asthma? [Single choice]*

○Yes ○No

20-8. In the past 12 months, have you experienced any symptoms of dyspnea or wheezing when exercising or after exercising? [Single choice] *

○Yes ○No

21. Have you ever experienced hives or other skin allergies? [Single choice]*

○Yes ○No

22. In the past 6 months, have you had a recurrent itchy rash? [Single choice]*

○Yes ○No

23. When was the house you currently live in built? [fill in the blank] *

_________________________________

24. What does the house you live in look like? [Single choice]*

○Multi-story (less than nine stories) ○High-rise (more than nine stories) ○Bungalow

○One floor? (less than two homes, two to four homes, more than five homes) ○Other _________________

25. Where do you live? [Single choice]*

[Downtown: A densely populated and prosperous area where people are engaged in non-agricultural activities as their main source of livelihood.

Rural: A place where the main source of livelihood is agriculture and the population is more dispersed.

Urban: A settlement characterized primarily by the concentration of non-agricultural industries and non-agricultural population; serves mainly the surrounding rural areas.]

○Downtown ○Rural ○Urban

26. Do you see cockroaches regularly in your home (can you see cockroach activity every month)? [Single choice]*

○Yes ○No

27. Do you have air conditioning in your home? (If no, please skip to question 28) [Single choice]*

○Yes ○No

28. In which house is the air conditioning installed? [Multiple choice]*

□ your living room □ your bedroom □ both

29. The living room floor in your home is: [Multiple Choice]*

□ tile or concrete □ wood flooring □ laminate flooring □ plastic flooring □ carpet

30. your bedroom floor is [multiple choice]*

□ tile or concrete □ wood flooring □ laminate flooring □ plastic flooring □ carpet

31. What kind of pillow do you use? [Single choice]*

□ Cotton □ Sponge □ Synthetic material □ Feather □ Plant-based (herbal)

32 Do you use a mattress? [Single choice]*

○Yes ○No

33. What kind of quilt do you use? [Multiple choice]*

□ Quilts □ Synthetic materials □ Feathers □ Blankets □ Other _________________


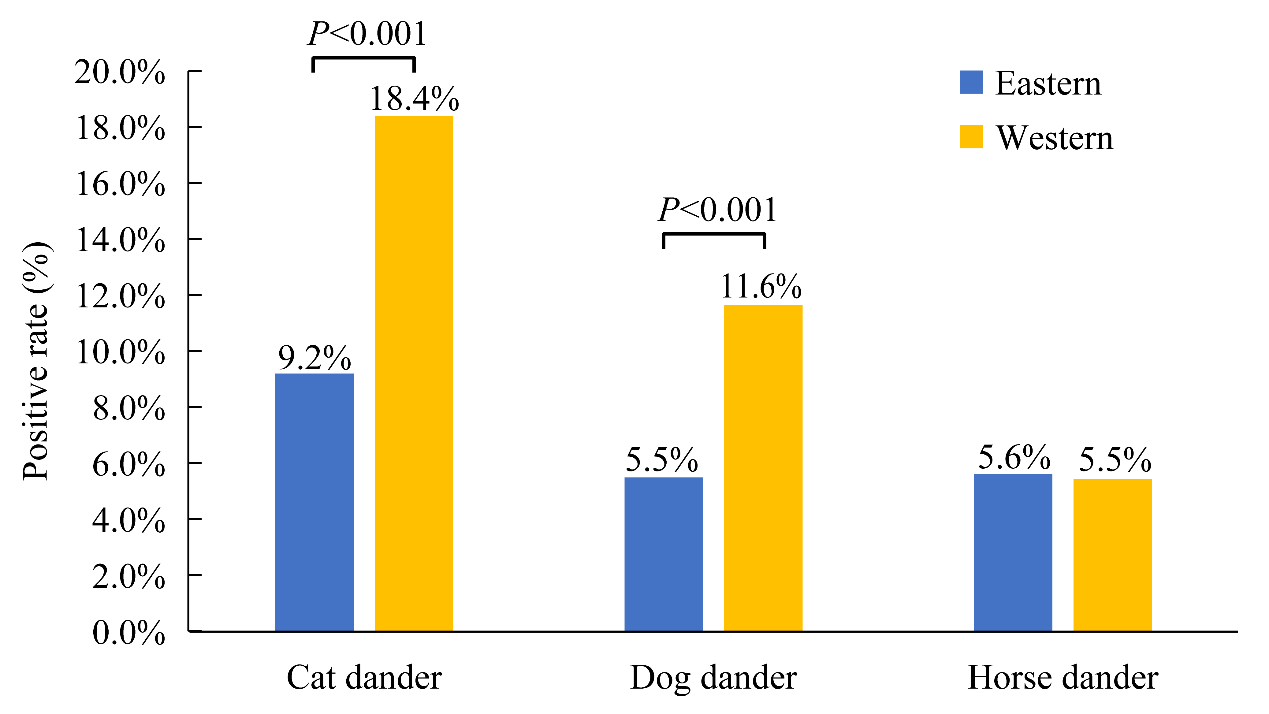


**Figure S2** Regional differences in the prevalence of positivity to 3 furry animal allergens. The Eastern and Western regions are divided according to the geographical location and the level of economic development of the city.
